# Supplementary material
Source: PubMed Central journal article supplement (PMC5119466)
Supplement: NIHMS829531-supplement-Table_S1.pdf [file NIHMS829531-supplement-Table_S1.pdf]

**Table S1: GenBank accession numbers of Brazilian porcine RVAs sequenced in this study**

| Full Strain Name                    | VP7           | VP4      | VP6      | VP1           | VP2      | VP3           | NSP1     | NSP2     | NSP3     | NSP4          | NSP5/6   |
|-------------------------------------|---------------|----------|----------|---------------|----------|---------------|----------|----------|----------|---------------|----------|
| RVA/Pig-wt/BRA/ROTA02/2013/G5P[13]  | KJ482510      | KJ482461 | KC855061 | KJ482383      | KJ482410 | KJ482437      | KC855055 | KJ482275 | KC855058 | KJ482329      | KJ482354 |
| RVA/Pig-wt/BRA/ROTA03/2013/G11P[23] | KJ482517      | KJ482462 | KC855062 | KJ482384      | KJ482411 | KJ482438      | KC855056 | KJ482276 | KC855059 | KJ482330      | KJ482355 |
| RVA/Pig-wt/BRA/ROTA04/2013/G5P[13]  | KJ482518      | KJ482463 | KJ482485 | KJ482385      | KJ482412 | KJ482439      | KJ482247 | KJ482277 | KJ482300 | KJ482331      | KJ482356 |
| RVA/Pig-wt/BRA/ROTA05/2013/G5P[13]  | KJ482519      | KJ482464 | KJ482486 | KJ482386      | KJ482413 | KJ482440      | KJ482248 | KJ482278 | KJ482301 | not sequenced | KJ482357 |
| RVA/Pig-wt/BRA/ROTA13/2013/G9P[6]   | KJ482524      | KJ482472 | KJ482503 | KJ482394      | KJ482421 | not sequenced | KJ482256 | KJ482286 | KJ482309 | KJ482339      | KJ482363 |
| RVA/Pig-wt/BRA/ROTA16/2013/G3P[13]  | KJ482527      | KJ482475 | KJ482504 | not sequenced | KJ482421 | not sequenced | KJ482259 | KJ482295 | KJ482312 | KJ482342      | KJ482379 |
| RVA/Pig-wt/BRA/ROTA18/2013/G5P[7]   | KJ482529      | KJ482477 | KJ482505 | KJ482398      | KJ482426 | KJ482451      | KJ482261 | KJ482290 | KJ482314 | KJ482344      | KJ482367 |
| RVA/Pig-wt/BRA/ROTA25/2013/G5P[13]  | KJ482516      | KJ482481 | KJ482499 | KJ482403      | KJ482430 | KJ482456      | KJ482268 | KJ482297 | KJ482321 | KJ482349      | KJ482372 |
| RVA/Pig-wt/BRA/ROTA27/2013/GxP[x]   | KJ482532      | KJ482482 | KJ482500 | KJ482404      | KJ482431 | KJ482457      | KJ482269 | KJ482292 | KJ482322 | KJ482350      | KJ482381 |
| RVA/Pig-wt/BRA/ROTA30/2013/G9P[23]  | KJ482534      | KJ482483 | KJ482501 | KJ482407      | KJ482434 | KJ482458      | KJ482272 | KJ482293 | KJ482325 | KJ482351      | KJ482375 |
| RVA/Pig-wt/BRA/ROTA31/2013/GxP[23]  | not sequenced | KJ482484 | KJ482502 | KJ482408      | KJ482435 | KJ482459      | KJ482273 | KJ482294 | KJ482326 | KJ482352      | KJ482376 |
