# Supplementary material
Source: PubMed Central journal article supplement (PMC5119466)
Supplement: NIHMS829531-supplement-Table_S2.pdf [file NIHMS829531-supplement-Table_S2.pdf]

Table S2: GenBank Accession numbers of human Wa-like RVAs and porcine RVAs analyzed in this study

| Full Strain Name                          | VP1          | VP2          | VP3           | NSP2     | NSP3         | NSP4          | NSP5/6   |
|-------------------------------------------|--------------|--------------|---------------|----------|--------------|---------------|----------|
| RVA/Human-tc/USA/1976/G2P[4]*             | HQ650116     | HQ650117     | HQ650118      | HQ650123 | HQ650122     | HQ650125      | HQ650126 |
| RVA/Human-wt/THA/CU938-BK/2011/G3P[8]     | JN706459     | JN706474     | JN706493      | JN706614 | JN706635     | JN706658      | JN706680 |
| RVA/Human-wt/THA/CU747-KK/2010/G3P[8]     | JN706457     | JN706472     | JN706495      | JN706612 | JN706634     | JN706656      | JN706678 |
| RVA/Human-wt/THA/CU460-KK/2009/G12P[8]    | JN706453     | JN706468     | JN706499      | JN706608 | JN706630     | JN706652      | JN706674 |
| RVA/Human-wt/CMR/MRC-DPRU1424/2009/G9P[8] | JN605404     | JN605405     | JN605406      | JN605411 | JN605412     | JN605413      | JN605414 |
| RVA/Human-wt/ZWE/MRC-DPRU1723/2009/G9P[8] | JN605415     | JN605416     | JN605417      | JN605422 | JN605423     | JN605424      | JN605425 |
| RVA/Human-wt/ZAF/MRC-DPRU1262/2004/G1P[8] | KP752742     | KP752743     | KP752744      | KP752738 | KP752739     | KP752740      | KP752741 |
| RVA/Human-wt/BEL/BE00030/2008/G1P[8]      | HQ392245     | HQ392254     | HQ392255      | HQ392246 | HQ392251     | HQ392249      | HQ392248 |
| RVA/Human-wt/BEL/BE00043/2009G1P[8]       | HQ392377     | HQ392386     | HQ392385      | HQ392378 | HQ392387     | HQ392382      | HQ392380 |
| RVA/Human-wt/BEL/BE00055/1999/G1P[8]      | JN258795     | JN258800     | JN258799      | JN258794 | JN258793     | JN258797      | JN258796 |
| RVA/Human-wt/BEL/B4633/2003/G12P[8]       | DQ146638     | DQ146639     | DQ146640      | DQ146645 | DQ146646     | DQ146647      | DQ146648 |
| RVA/Human-wt/BEL/B3458/2003/G9P[8]        | DQ870501     | DQ870502     | DQ870503      | EF990710 | EF990711     | EF990712      | EF990713 |
| RVA/Human-wt/USA/2008747100/2008/G1P[8]   | HM773788     | HM773789     | HM773790      | HM773795 | HM773794     | HM773797      | HM773798 |
| RVA/Human-wt/USA/2008747288/2008/G1P[8]   | JN258375     | JN258385     | JN258384      | JN258376 | JN258381     | JN258379      | JN258378 |
| RVA/Human-wt/USA/2007719720/2007/G1P[8]   | JN258331     | JN258341     | JN258336      | JN258332 | JN258334     | JN258339      | JN258333 |
| RVA/Human-wt/USA/VU08-09-20/2008/G3P[8]   | JF790326     | JF790330     | JF790328      | JF790321 | JF790324     | JF790323      | JF790322 |
| RVA/Human-wt/USA/VU06-07-21/2006/G1P[8]   | JF490908     | JF490918     | JF490917      | JF490909 | JF490914     | JF490912      | JF490911 |
| RVA/Human-wt/USA/VU06-07-32/2006/G1P[8]   | JF490930     | JF490940     | JF490939      | JF490931 | JF490936     | JF490934      | JF490933 |
| RVA/Human-wt/USA/VU05-06-2/2005/G1P[8]    | JF490556     | JF490566     | JF490565      | JF490557 | JF490562     | JF490560      | JF490559 |
| RVA/Human-wt/USA/VU05-06-47/2005/G1P[8]   | JF490732     | JF490742     | JF490741      | JF490733 | JF490738     | JF490736      | JF490735 |
| RVA/Human-wt/AUS/CK00100/2010/G1P[8]      | JX027974     | JX027977     | JX027976      | JX027967 | JX027972     | JX027970      | JX027969 |
| RVA/Human-wt/AUS/CK00088/2009/G1P[8]      | JX027868     | JX027878     | JX027877      | JX027869 | JX027874     | JX027872      | JX027871 |
| RVA/Human-wt/AUS/CK00034/2007/G1P[8]      | JF490402     | JF490412     | JF490411      | JF490403 | JF490407     | JF490405      | JF490404 |
| RVA/Human-wt/AUS/CK00005/2004/G1P[8]      | JF490127     | JF490134     | JF490137      | JF490128 | JF490132     | JF490131      | JF490130 |
| RVA/human-tc/CHN/R588/2005/G1P[8]         | JQ087434     | JQ087435     | JQ087436      | JQ087441 | JQ087442     | JQ087443      | JQ087444 |
| RVA/Human-tc/CHN/Y128/2004/G1P[8]         | JQ087423     | JQ087424     | JQ087425      | JQ087430 | JQ087431     | JQ087432      | JQ087433 |
| RVA/Human-wt/ITA/JES11/2010/G9P[8]        | JX195085     | JX195086     | JX195087      | JX195092 | JX195093     | JX195094      | JX195095 |
| RVA/Human-wt/ITA/AV21/2010/G9P[8]         | JX195063     | JX195064     | JX195065      | JX195070 | JX195071     | JX195072      | JX195073 |
| RVA/Human-wt/DEU/GER126-08/2008/G12P[8]   | FJ747613     | FJ747614     | FJ747615      | FJ747621 | FJ747622     | FJ747623      | FJ747624 |
| RVA/human-wt/DEU/GER172-08/2008/G12P[6]   | FJ747625     | FJ747626     | FJ747627      | FJ747632 | FJ747633     | FJ747634      | FJ747635 |
| RVA/Human-wt/IND/61060/2006/G1P[8]        | HQ609554     | HQ609557     | HQ609560      | HQ609569 | HQ609572     | HQ609575      | HQ609578 |
| RVA/Human-wt/IND/6361/2006/G1P[8]         | HQ609552     | HQ609555     | HQ609558      | HQ609567 | HQ609570     | HQ609573      | HQ609576 |
| RVA/Human-wt/PRY/954SR/2005/G4P[8]        | KJ559301     | KJ559302     | KJ559303      | KJ559297 | KJ559298     | KJ559299      | KJ559300 |
| RVA/Human-wt/PRY/1638SR/2008/G1P[8]       | KJ412710     | KJ412711     | KJ412712      | KJ412706 | KJ412707     | KJ412708      | KJ412709 |
| RVA/Human-tc/JPN/YO/1977/G3P[8]           | DQ870497     | DQ870498     | DQ870499      | JX629047 | JX629048     | AB008236      | JX629049 |
| RVA/Human-tc/BRA/IAL28/1992/G5P[8]        | EF583029     | EF583030     | EF583031      | EF672587 | EF672586     | EF672589      | EF672590 |
| RVA/Human-wt/USA/DC1476/1974/G1P[8]       | KC57956      | KC579565     | KC579566      | KC579560 | KC579561     | KC579562      | KC579563 |
| RVA/Human-wt/USA/DC1600/1980/G3P[8]       | FJ947771     | FJ947772     | FJ947773      | FJ947778 | FJ947777     | FJ947780      | FJ947781 |
| RVA/Human-wt/USA/DC4608/1980/G4P[8]       | HM773898     | HM773899     | HM773900      | HM773905 | HM773904     | HM773907      | HM773908 |
| RVA/Human-wt/BEL/BE2001/2009/G9P[6]       | JQ993321     | JQ993322     | JQ993323      | JQ993325 | JQ993326     | JQ993327      | JQ993328 |
| RVA/Human-wt/ARG/Arg4605/2006/G4P[6]      | KC412043     | KC412044     | KC412046      | KC412035 | not included | GQ282605      | KC412041 |
| RVA/Human-tc/THA/Mc323/1989/G9P[19]       | JN104611     | JN104612     | JN104613      | JN104616 | JN104617     | JN104618      | U54772   |
| RVA/Human-wt/HUN/BP271/2000/G4P[6]        | KF835889     | KF835897     | KF835905      | KF835945 | not included | KF835961      | KF835969 |
| RVA/Human-wt/HUN/BP1227/2002/G4P[6]       | KF835891     | KF835899     | KF835907      | KF835947 | KF835955     | KF835963      | KF835971 |
| RVA/Human-wt/HUN/BP1547/2005/G4P[6]       | KF835894     | KF835902     | KF835910      | KF835950 | not included | KF835966      | KF835974 |
| RVA/Human-wt/PRY/1809SR/2009/G4P[6]       | KJ412564     | KJ412565     | KJ412566      | KJ412560 | not included | KJ412562      | KJ412563 |
| RVA/Human-wt/BGD/Dhaka6/2001/G11P[25]     | EF560705     | GU199519     | EF560706      | EF560709 | EF560710     | EF560711      | EF560712 |
| RVA/Human-wt/BGD/Matlab36/2002/G11P[8]    | GU199503     | GU199504     | GU199505      | GU199510 | GU199511     | GU199512      | GU199513 |
| RVA/Human-wt/JPN/Ryukyu-1120/2011/G5P[6]  | AB741649     | AB741650     | AB741651      | AB741656 | AB741657     | AB741658      | AB741659 |
| RVA/Human-tc/AUS/RV3/1993/G3P[6]          | FJ998270     | FJ998271     | FJ998272      | FJ998277 | FJ998276     | FJ998279      | FJ998280 |
| RVA/Human-tc/IND/116E/1985/G9P[11]        | FJ361201     | FJ361202     | FJ361203      | FJ361208 | FJ361207     | FJ361210      | FJ361211 |
| RVA/Human-wt/ECU/EC2184/G11P[6]           | GQ149091     | GQ149092     | GQ149093      | GQ149101 | GQ149098     | GQ149099      | GQ149100 |
| RVA/Pig-wt/BRA/ROTA01/2013/G5P[13]        | KJ482382     | KJ482409     | KJ482436      | KJ482274 | not included | KJ482328      | KJ482353 |
| RVA/Pig-wt/BRA/ROTA02/2013/G5P[13]        | not included | KJ482410     | not included  | KJ482275 | not included | KJ482329      | KJ482354 |
| RVA/Pig-wt/BRA/ROTA03/2013/G11P[23]       | KJ482384     | KJ482411     | KJ482438      | KJ482276 | not included | KJ482330      | KJ482355 |
| RVA/Pig-wt/BRA/ROTA04/2013/G5P[13]        | KJ482385     | KJ482412     | not included  | KJ482277 | not included | KJ482331      | KJ482356 |
| RVA/Pig-wt/BRA/ROTA05/2013/G5P[13]        | not included | KJ482413     | not included  | KJ482278 | KJ482301     | not sequenced | KJ482357 |
| RVA/Pig-wt/BRA/ROTA06/2013/G11P[6]        | KJ482387     | KJ482414     | KJ482441      | KJ482279 | not included | KJ482332      | KJ482358 |
| RVA/Pig-wt/BRA/ROTA07/2013/G5P[13]        | KJ482388     | KJ482415     | KJ482442      | KJ482280 | not included | KJ482333      | KJ482377 |
| RVA/Pig-wt/BRA/ROTA08/2013/G3P[6]         | KJ482389     | KJ482416     | KJ482443      | KJ482281 | not included | KJ482334      | KJ482359 |
| RVA/Pig-wt/BRA/ROTA09/2013/G3P[13]        | KJ482390     | KJ482417     | KJ482444      | KJ482282 | not included | KJ482335      | KJ482378 |
| RVA/Pig-wt/BRA/ROTA10/2013/G9P[13]        | KJ482391     | KJ482418     | KJ482445      | KJ482283 | KJ482306     | KJ482336      | KJ482360 |
| RVA/Pig-wt/BRA/ROTA11/2013/G9P[23]        | KJ482392     | KJ482419     | KJ482446      | KJ482284 | KJ482307     | KJ482337      | KJ482361 |
| RVA/Pig-wt/BRA/ROTA12/2013G9P[23]         | KJ482393     | KJ482420     | KJ482447      | KJ482285 | KJ482308     | KJ482338      | KJ482362 |
| RVA/Pig-wt/BRA/ROTA13/2013/G9P[6]         | not included | not included | not sequenced | KJ482286 | not included | KJ482339      | KJ482363 |

|                                      |               |              |               |          |               |              |          |
|--------------------------------------|---------------|--------------|---------------|----------|---------------|--------------|----------|
| RVA/Pig-wt/BRA/ROTA14/2013/G9P[23]   | KJ482395      | KJ482422     | KJ482448      | KJ482287 | KJ482310      | KJ482340     | KJ482364 |
| RVA/Pig-wt/BRA/ROTA15/2013G9P[23]    | KJ482396      | KJ482423     | KJ482449      | KJ482288 | KJ482311      | KJ482341     | KJ482365 |
| RVA/Pig-wt/BRA/ROTA16/2013/G3P[13]   | not sequenced | not included | not sequenced | KJ482295 | not included  | KJ482342     | KJ482379 |
| RVA/Pig-wt/BRA/ROTA17/2013/G5P[6]    | KJ482397      | KJ482425     | KJ482450      | KJ482289 | not included  | KJ482343     | KJ482366 |
| RVA/Pig-wt/BRA/ROTA18/2013/G5P[7]    | KJ482398      | KJ482426     | not included  | KJ482290 | not included  | KJ482344     | KJ482367 |
| RVA/Pig-wt/BRA/ROTA24/2013/G5P[6]    | KJ482402      | KJ482429     | KJ482455      | KJ482291 | not included  | KJ482348     | KJ482371 |
| RVA/Pig-wt/BRA/ROTA25/2013/G5P[13]   | KJ482403      | KJ482430     | KJ482456      | KJ482297 | not included  | KJ482349     | KJ482372 |
| RVA/Pig-wt/BRA/ROTA27/2013/GxP[x]    | KJ482404      | not included | KJ482457      | KJ482292 | KJ482322      | KJ482350     | KJ482381 |
| RVA/Pig-wt/BRA/ROTA30/2013/G9P[23]   | KJ482407      | KJ482434     | KJ482458      | KJ482293 | KJ482325      | KJ482351     | KJ482375 |
| RVA/Pig-wt/BRA/ROTA31/2013/GxP[23]   | KJ482408      | KJ482435     | KJ482459      | KJ482294 | KJ482326      | KJ482352     | KJ482376 |
| RVA/Pig-wt/BEL/12R022/2012/G2P[27]   | KM820698      | KM820705     | KM820712      | KM820670 | not included  | not included | KM820691 |
| RVA/Pig-wt/BEL/12R002/2012/G5P[7]    | KM820695      | KM820702     | not included  | KM820667 | KM820674      | KM820681     | KM820688 |
| RVA/Pig-wt/BEL/12R006/2012/G3P[6]    | KM820697      | KM820704     | KM820711      | KM820669 | KM820676      | KM820683     | KM820690 |
| RVA/Pig-wt/BEL/12R005/2012/G4P[7]    | KM820696      | KM820703     | KM820710      | KM820668 | not included  | KM820682     | KM820689 |
| RVA/Pig-wt/BEL/12R041/2012/G9P[13]   | KM820700      | KM820706     | KM820713      | KM820671 | not included  | KM820685     | KM820692 |
| RVA/Pig-wt/BEL/12R046/2012/G9P[23]   | KM820699      | KM820707     | KM820714      | KM820672 | KM820679      | KM820686     | KM820693 |
| RVA/Pig-wt/ITA/3BS/2009/G9P[23]      | KC610689      | KC610690     | KC610691      | KC610696 | KC610697      | KC610698     | KC610699 |
| RVA/Pig-wt/ITA/2CR/2009/G9P[23]      | KC610678      | KC610679     | KC610680      | KC610685 | not included  | KC610687     | KC610688 |
| RVA/Pig-wt/ITA/7RE/2009/G9P[23]      | KC610700      | KC610701     | KC610702      | KC610707 | KC610708      | KC610709     | KC610710 |
| RVA/Pig-tc/THA/CMP45/08/2008/G3P[23] | AB779624      | AB779628     | AB779632      | AB779640 | AB779644      | HQ268839     | HQ268844 |
| RVA/Pig-tc/THA/CMP29/08/2008/G3P[13] | AB779622      | AB779626     | AB779630      | AB779638 | AB779642      | HQ268837     | HQ268842 |
| RVA/Pig-tc/THA/CMP40/08/2008/G3P[23] | AB779623      | AB779627     | AB779631      | AB779639 | AB779643      | HQ268838     | HQ268843 |
| RVA/Pig-tc/THA/CMP48/08/2008/G3P[23] | AB779625      | AB779629     | AB779633      | AB779641 | AB779645      | HQ268841     | HQ268846 |
| RVA/Pig-tc/KOR/PRG921/2006/G9P[23]   | JF796712      | JF796713     | JF796714      | JF796708 | JF796709      | JF796710     | JF796711 |
| RVA/Pig-tc/KOR/PRG9121/2006/G9P[7]   | JF796734      | JF796735     | JF796736      | JF796730 | JF796731      | JF796732     | JF796733 |
| RVA/Pig-tc/KOR/PRG9235/2006/G9P[23]  | JF796701      | JF796702     | JF796703      | JF796697 | JF796698      | JF796699     | JF796700 |
| RVA/Pig-tc/KOR/PRG942/2006/G9P[23]   | JF796723      | JF796724     | JF796725      | JF796719 | JF796720      | JF796721     | JF796722 |
| RVA/Pig-wt/CAN/F8-4/2006/G2P[x]      | JN974795      | JN974799     | JN974802      | JN974782 | not included  | JN974786     | JN974791 |
| RVA/Pig-wt/CAN/F7-4/2006/G9P[x]      | JN974794      | JN974798     | JN974800      | JN974779 | not sequenced | JN974789     | JN974792 |
| RVA/Pig-wt/JPN/BU8/2014/G4P[6]       | AB924095      | AB924096     | AB924097      | AB924102 | AB924103      | AB924104     | AB924105 |
| RVA/Pig-wt/JPN/BU2/2014/G5P[7]       | AB924084      | AB924085     | AB924086      | AB924091 | AB924092      | AB924093     | AB924094 |
| RVA/Pig-tc/BEL/RV277/1977/G1P[7]     | KM820701      | KM820708     | KM820715      | KM820673 | not included  | KM820687     | KM820694 |
| RVA/Pig-tc/USA/OSU/1977/G5P[7]       | KR052767      | KR052768     | KR052769      | KR052763 | KR052764      | KR052765     | KJ450852 |
| RVA/Pig-tc/MEX/YM/1983/G11P[7]       | X76486        | GU199516     | AY300922      | GU199517 | GU199518      | X69485       | X69486   |
| RVA/Pig-tc/USA/Gottfried/1983/G4P[6] | KR052746      | KR052747     | KR052748      | KR052742 | KR052743      | KR052744     | KR052745 |
| RVA/Pig-wt/IND/RU172/2002/G12P[7]    | GU199191      | GU199192     | GU199193      | GU199195 | GU199196      | DQ204740     | DQ204739 |
| RVA/Pig-wt/VEN/A131/1988/G3P[7]      | EF560618      | EF560619     | EF560620      | EF990688 | EF990689      | AF144798     | EF990690 |
| RVA/Pig-tc/CHN/NMTL/2008/G9P[23]     | JF781158      | JF781159     | JF781160      | JF781165 | JF781166      | JF781167     | JF781168 |

\*Outgroup; genotype 2 genes
